# Supplementary material for: Fabrication and visible light photocatalytic activity of a novel Ag/TiO2−xNx nanocatalyst
Source: Royal Society of Chemistry journal article supplement (doi:10.1039/c0nj00268b), 2010-01-01

## Fabrication and visible-light photocatalytic activity of novel Ag/TiO<sub>2-x</sub>N<sub>x</sub> photocatalyst

Jurate Virkutyte, \*† and Rajender S. Varma\*<sup>a</sup>

Sustainable Technology Division, National Risk Management Research Laboratory,  
Environmental Protection Agency, MS 443, 26 West M. L. K. Drive, Cincinnati-45268 Ohio,  
USA . Fax: 5135697677; Tel:5135692701; E-mail: Varma.Rajender@epa.gov  
†NRC Research Associate, E-mail:Virkutyte.Jurate@epa.gov

Figure S1. TGA curve of Ag/TiO<sub>2-x</sub>N<sub>x</sub> photocatalyst

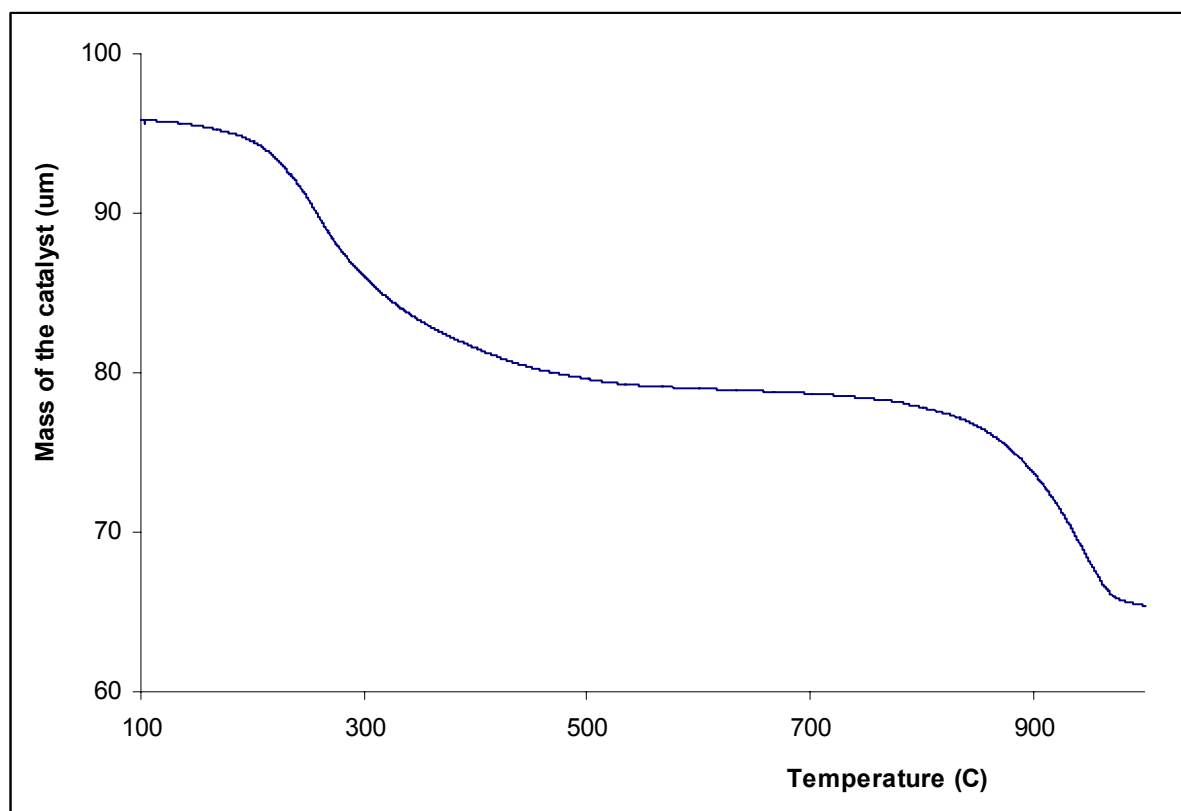

Supplement: c0nj00268b.pdf [file c0nj00268b.pdf]
